# Supplementary material for: Human Case of Severe Fever with Thrombocytopenia Syndrome Virus Infection, Taiwan, 2019
Source: PubMed Central journal article supplement (PMC7323535; doi:10.3201/eid2607.200104), 2020-07
Supplement: 20-0104-Techapp-s1.pdf [file 20-0104-Techapp-s1.pdf]

# Human Case of Severe Fever with Thrombocytopenia Syndrome Virus Infection, Taiwan, 2019

## Appendix

### RNA Extraction and Reverse Transcription PCR (RT-PCR)

We extracted RNA from 140  $\mu$ L acute-phase sera specimens using the QIAamp Viral RNA Mini Kit (QIAGEN, <https://www.qiagen.com>) according to the manufacturer's instructions. We performed real-time RT-PCR amplification using Quantitect SYBR green RT PCR kit (QIAGEN) with the following parameters: 50°C for 30 min; 95°C for 15 min and 45 cycles of 95°C for 15 sec, 55°C for 30 sec, 72°C for 20 sec, and 77°C for 20 sec; and 95°C for 1 min, melting curve program from 68°C to 95°C. We analyzed the results using the software program of the LightCycler 96 or 480 Real-Time PCR system (Roche Diagnostics, <https://www.roche.com>). The plasmid containing S genomic segment of severe fever with thrombocytopenia syndrome virus (SFTSV) HB29 strain (GenBank accession no. NC 018137) served as positive control for the RT-PCR assay.

### RT-PCR and Nucleotide Sequencing

We extracted RNA from the patient's serum sample and further subjected it to RT-PCR for sequencing. The primers were designed based on the S (AB985557), M (AB985653 and AB985320), and L (AB983531) segment sequences. We performed RT-PCR using Superscript III One-Step RT-PCR system with Platinum Taq High Fidelity (Invitrogen, <https://www.thermofisher.com>) under the following conditions: 55°C for 30 min; 94°C for 2 min and 40 cycles of 94°C for 15 sec, 50°C or 54°C for 30 sec, and 68°C for 1 min; and a prolonged extension at 68°C for 5 min. We sequenced the RT-PCR products directly by using the BigDye Terminator Cycle Sequencing Kit and the ABI 3730xl DNA analyzer (Applied Biosystems,

<https://www.thermofisher.com>) according to the manufacturer's protocol. We used each forward and reverse primer for sequencing and the overlapping sequences were combined.

## References

1. Zhang YZ, He YW, Dai YA, Xiong Y, Zheng H, Zhou DJ, et al. Hemorrhagic fever caused by a novel Bunyavirus in China: pathogenesis and correlates of fatal outcome. *Clin Infect Dis*. 2012;54:527–33. PubMed <http://dx.doi.org/10.1093/cid/cir804>
2. Yoshikawa T, Fukushi S, Tani H, Fukuma A, Taniguchi S, Toda S, et al. Sensitive and specific PCR systems for detection of both Chinese and Japanese severe fever with thrombocytopenia syndrome virus strains and prediction of patient survival based on viral load. *J Clin Microbiol*. 2014;52:3325–33. PubMed <http://dx.doi.org/10.1128/JCM.00742-14>
3. Sun Y, Liang M, Qu J, Jin C, Zhang Q, Li J, et al. Early diagnosis of novel SFTS bunyavirus infection by quantitative real-time RT-PCR assay. *J Clin Virol*. 2012;53:48–53. PubMed <http://dx.doi.org/10.1016/j.jcv.2011.09.031>
4. Shu PY, Chang SF, Kuo YC, Yueh YY, Chien LJ, Sue CL, et al. Development of group- and serotype-specific one-step SYBR green I-based real-time reverse transcription-PCR assay for dengue virus. *J Clin Microbiol*. 2003;41:2408–16. PubMed <http://dx.doi.org/10.1128/JCM.41.6.2408-2416.2003>
5. Pastorino B, Bessaud M, Grandadam M, Murri S, Tolou HJ, Peyrefitte CN. Development of a TaqMan RT-PCR assay without RNA extraction step for the detection and quantification of African chikungunya viruses. *J Virol Methods*. 2005;124:65–71. PubMed <http://dx.doi.org/10.1016/j.jviromet.2004.11.002>
6. Wen HL, Zhao L, Zhai S, Chi Y, Cui F, Wang D, et al. Severe fever with thrombocytopenia syndrome, Shandong Province, China, 2011. *Emerg Infect Dis*. 2014;20:1–5. PubMed <http://dx.doi.org/10.3201/eid2001.120532>

**Appendix Table 1.** Primers used for SYBR green I-based real-time RT-PCR assay for severe fever with thrombocytopenia syndrome virus infection, Taiwan, 2019.\*

| Name        | Sequence (5' to 3')       | Amplicon (bp) | Reference  |
|-------------|---------------------------|---------------|------------|
| SFTSV-SF    | ACCTCTTTGACCCTGAGTTWGACA  | 125           | (1)        |
| SFTSV-SR    | CTGAAGGAGACAGGTGGAGATGA   |               |            |
| SFTSV-NP-1F | ATCGTCAAGGCATCAGGGAA      | 458           | (2)        |
| SFTSV-NP-1R | TTCAGCCACTTCACCCGAA       |               |            |
| SFTSV-NP-2F | CATCATTGTCTTTGCCCTGA      | 461           | (2)        |
| SFTSV-NP-2R | AGAAGACAGAGTTCACAGCA      |               |            |
| SFTS-1F     | GGAAACTGGRAGAGAGAACT      | 240           | This study |
| SFTS-1R     | GAAGTGAACAAGTGGTGGTT      |               |            |
| SFTSV-LF    | AGTCTAGGTCATCTGATCCGTTYAG | 92            | (3)        |
| SFTSV-LR    | TGTAACTTCGCCCTTTGTCCAT    |               |            |
| DN-F        | CAATATGCTGAAACGCGAGAGAAA  | 171           | (4)        |
| DN-R1       | CCCCATCTAACCAATATTCCTGCT  |               |            |
| DN-R2       | CCCCATCTGTTCCAGTATCCCTGCT |               |            |
| FL-F1       | TGYGTBTACAACATGATGGG      | 272<br>or 200 | This study |
| FL-F2       | ATATGGTACATGTGGCTAGGAGC   |               |            |
| FL-R        | GTGTCCCANCCHGCTGTGTCA     |               |            |
| F-CHIK      | AAGCTYCGCGTCCTTTACCAAG    | 209           | (5)        |
| R-CHIK      | CAAATTGTCCYGGTCTTCTT      |               |            |

\*RT-PCR, reverse transcription PCR; SFTSV, severe fever with thrombocytopenia syndrome virus.

**Appendix Table 2.** Primers used for conventional RT-PCR assay and sequencing for severe fever with thrombocytopenia syndrome virus infection, Taiwan, 2019.\*

| Name         | Sequence (5' to 3')   | Amplicon (bp) | Reference  |
|--------------|-----------------------|---------------|------------|
| SFTSVS1_F    | ACACAAAGAACCCCCAAAAAG | 605           | This study |
| SFTSVS1_R    | CTCCGCGCATCTTCACATTG  |               |            |
| SFTSVS2_F    | GTCAGAGTGGTCCGGAGTTG  | 560           |            |
| SFTSVS2_R    | CTCCGCGCATCTTCACATTG  |               |            |
| SFTSVS3_F    | GGTTGTGGAATGGGCACCTA  | 730           |            |
| SFTSVS3_R    | ACTGTCAGGCTTGAGCCATC  |               |            |
| SFTSVS4_F    | CTGATTCCAAGTGCAGGGGT  | 747           |            |
| SFTSVS4_R    | GCCATAGAGAAGCGAAGGCT  |               |            |
| SFTSVS5_F    | AGCCTTCGCTTCTCTATGGC  | 523           |            |
| SFTSVS5_R    | ACACAAAGAACCCCCTTCAT  |               |            |
| SFTSVM1_F    | ACACAGAGACGGCCAACA    | 774           |            |
| SFTSVM1_R    | GATGAGCTCTCTTGACCCCA  |               |            |
| SFTSVM2_F    | ACCTCAGCCCCTTGATGTTG  | 690           |            |
| SFTSVM2_R    | TTTGCAGGGTAGCACTGAGG  |               |            |
| SFTSVM3_F    | GTGGCAAGAAAAGCACGGAG  | 660           |            |
| SFTSVM3_R    | GCAGACATGCCTCTTGTCCT  |               |            |
| SFTSVM4_F    | TCTGTGAGCTGCTTGATGGG  | 836           |            |
| SFTSVM4_R    | TCACACAGGTCAGTCAAGCC  |               |            |
| SFTSVM5_F    | GGCCCCTTCATGCATCTTCT  | 746           |            |
| SFTSVM5_R    | ACGCAGTCTCATCCCCTTTG  |               |            |
| SFTSVM6_F    | CCCTTGGACATCACAGCCAT  | 640           |            |
| SFTSVM6_R    | CAACTCCCCTGAGAGCACTG  |               |            |
| SFTSVM7_F    | CCCTTGGACATCACAGCCAT  | 723           |            |
| SFTSVM7_R    | ACACAAAGACCGGCCAACAC  |               |            |
| SFTSVL1_F    | ACACAGAGACGCCAG       | 857           |            |
| SFTSVL1_R    | GATCAGCATAGGCCTCCACC  |               |            |
| SFTSVL2_F    | CCAGGCCTGTACGACCAAAT  | 834           |            |
| SFTSVL2_R    | CTCTAGCCGCTCCTGAATGG  |               |            |
| SFTSVL3_F    | CCATTCAGGAGCGGCTAGAG  | 901           |            |
| SFTSVL3_R    | TCCCCAGCATCAATGGTGTC  |               |            |
| SFTSVL4_F    | CATCTGGATTGCATGGTGCG  | 728           |            |
| SFTSVL4_R    | GGGCTCAACTCACAGACACA  |               |            |
| SFTSVL5_F    | CAGAACCTTGAGGAGCGTGT  | 886           |            |
| SFTSVL5_R    | TGACATCCACCACCCATTG   |               |            |
| SFTSVL6_F    | CAATGGGGTGGTGGATGTCA  | 748           |            |
| SFTSVL6_R    | CTGCTCCACCCAGTCTTCAG  |               |            |
| SFTSVL7_F    | CCTCATGGACAACCCTGCAT  | 856           |            |
| SFTSVL7_R    | AAAGGGGCCATCCCTCAATG  |               |            |
| SFTSVL8_F    | AGGTGTGGTTTGGCCTGAAA  | 857           |            |
| SFTSVL8_R    | ACAGCCGTCAAGTCCTTGATG |               |            |
| SFTSVL9_F    | TGCATGGTTAGGCTGAGTGG  | 997           |            |
| SFTSVL9_R    | ACACAAAGACCGCCAGATC   |               |            |
| SFTSV_1324LF | GGCAGCAAACGAGAAGAAAG  | 1003          | (6)        |
| SFTSV_2326LR | CATTTCTCCGAGGGCATTTA  |               |            |

\*RT-PCR, reverse transcription PCR; SFTSV, severe fever with thrombocytopenia syndrome virus.

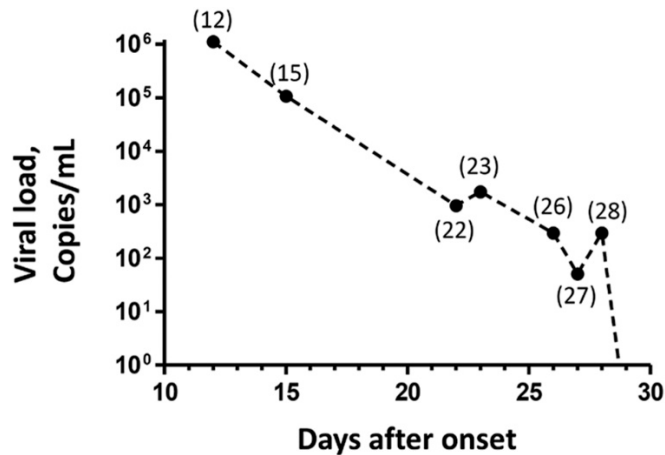

**Appendix Figure 1.** Viral loads in serum samples of the severe fever with thrombocytopenia syndrome case in Taiwan. Viral copy numbers were calculated by SYBR-Green I-based real-time one-step RT-PCR with an SFTSV-specific primer set (SFTSV-SF and SFTSV-SR). The days after disease onset are marked.

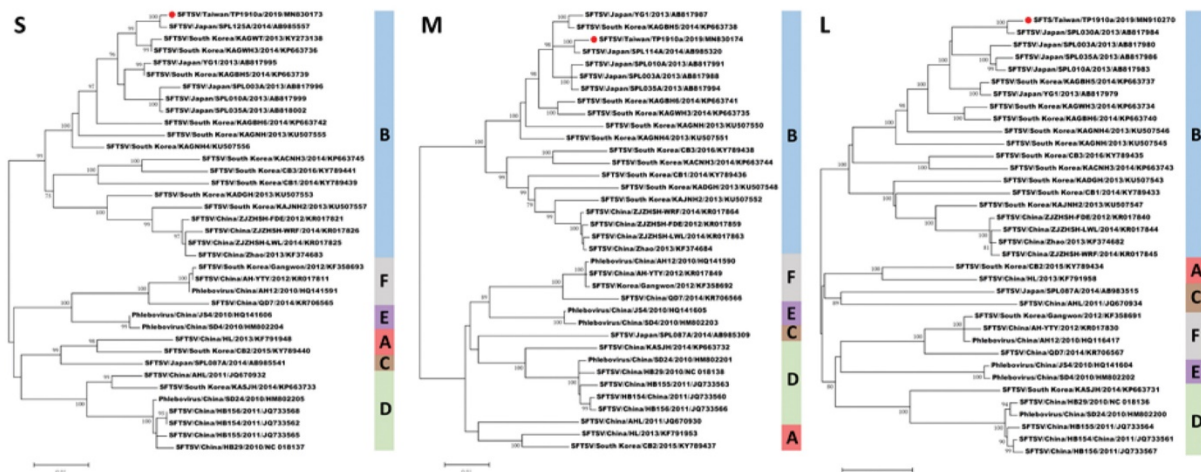

**Appendix Figure 2.** Phylogenetic analysis of severe fever with thrombocytopenia syndrome case in Taiwan. Trees show the genetic relationships of six genotypes according to the partial S segment (1,704 bp) containing the complete nucleocapsid and nonstructural protein gene sequences of SFTSV strains (S), the partial M segment (3,340) containing the complete membrane glycoprotein gene sequence of SFTSV strains (M) and the partial L segment (6,332 bp) containing the complete RNA polymerase gene sequence of SFTSV strains (L). Viruses were identified by virus/country/strain/year of isolation/GenBank accession no. The analysis was performed by using MEGA7 software and the maximal-likelihood method (Kimura 2-parameter model). Bootstrap support values  $\geq 75$  are shown (1,000 replicates) along the branches. Scale bars indicate nucleotide substitutions per site.

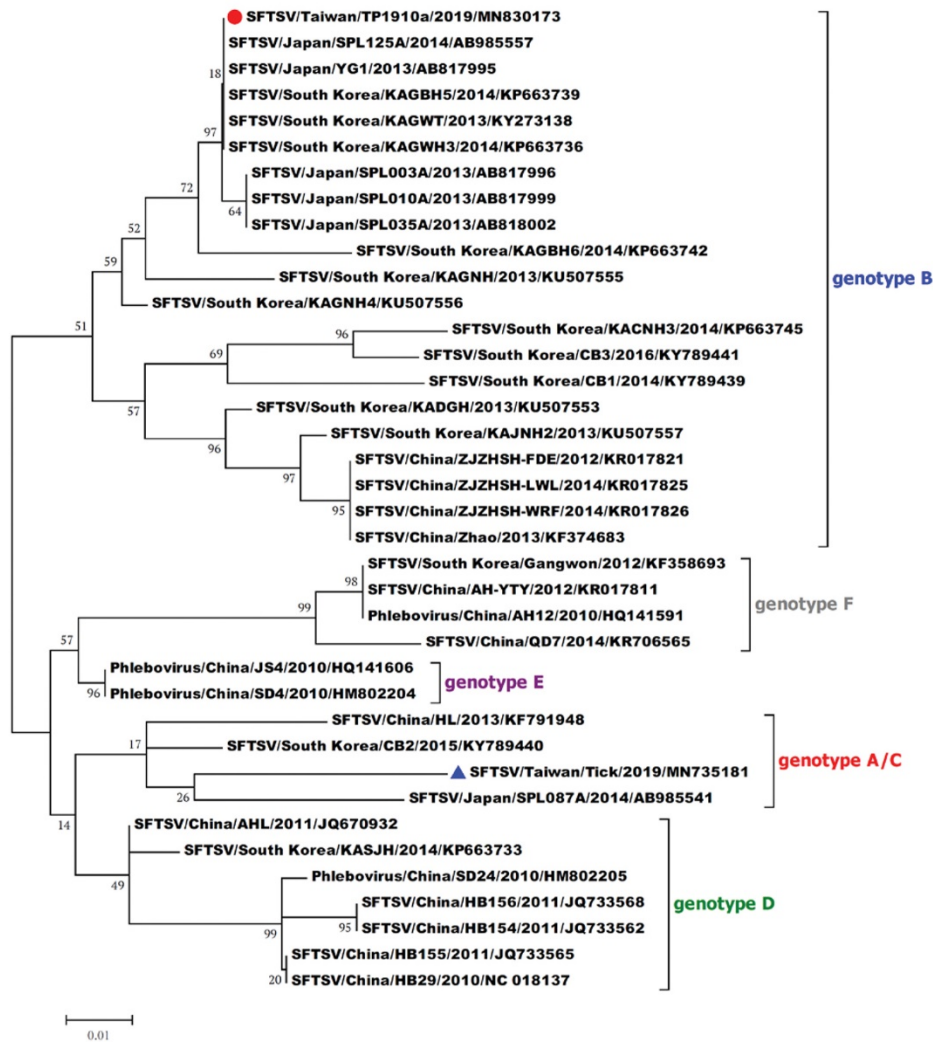

**Appendix Figure 3.** Phylogenetic analysis of severe fever with thrombocytopenia syndrome virus identified in the human case (red solid circle) and *R. microplus* tick (blue solid triangle) in Taiwan. Trees show the genetic relationships of six genotypes according to the partial S segment nucleotide sequences (304 bp) of nucleocapsid protein gene of SFTSV strains. Viruses were identified by virus/country/strain/year of isolation/GenBank accession no. The analysis was performed by using MEGA7 software and the maximal-likelihood method (Kimura 2-parameter model). All bootstrap support values are shown (1,000 replicates) along the branches. Scale bars indicate nucleotide substitutions per site.
